# Supplementary material for: The GRAS gene family in watermelons: identification, characterization and expression analysis of different tissues and root-knot nematode infestations
Source: PeerJ. 2021 May 26;9:e11526. doi: 10.7717/peerj.11526 (PMC8164414; doi:10.7717/peerj.11526)
Supplement: Supplemental Information 4 [file peerj-09-11526-s004.xlsx]

## Sheet: Sheet1
Table S3 The detailed information of the proteins in PPI network
#node1	node2	node1_string_internal_id	node2_string_internal_id	node1_external_id	node2_external_id	neighborhood_on_chromosome	gene_fusion	phylogenetic_cooccurrence	homology	coexpression	experimentally_determined_interaction	database_annotated	automated_textmining	combined_score
SHR	SCR	628466	623619	3702.AT4G37650.1	3702.AT3G54220.1	0	0	0	0.662	0	0.95	0	0	0.95
JKD	SHR	628952	628466	3702.AT5G03150.1	3702.AT4G37650.1	0	0	0	0	0	0.915	0	0	0.915
JKD	SCR	628952	623619	3702.AT5G03150.1	3702.AT3G54220.1	0	0	0	0	0	0.915	0	0	0.915
AT5G41920	SHR	632239	628466	3702.AT5G41920.1	3702.AT4G37650.1	0	0	0	0.696	0	0.765	0	0	0.765
AHBP-1B	SCL14	629356	608530	3702.AT5G06950.1	3702.AT1G07530.1	0	0	0	0	0	0.765	0	0	0.765
BZR1	GAI	614315	609337	3702.AT1G75080.2	3702.AT1G14920.1	0	0	0	0	0	0.765	0	0	0.765
PHYB	PHYA	616034	608751	3702.AT2G18790.1	3702.AT1G09570.1	0	0	0	0.949	0	0.765	0	0	0.765
DAG1	GAI	624417	609337	3702.AT3G61850.4	3702.AT1G14920.1	0	0	0	0	0	0.765	0	0	0.765
GAI	PHYA	609337	608751	3702.AT1G14920.1	3702.AT1G09570.1	0	0	0	0	0	0.765	0	0	0.765
PAT1	SCL21	632935	615294	3702.AT5G48150.2	3702.AT2G04890.1	0	0	0	0.97	0	0.765	0	0	0.765
SCL13	PHYB	626244	616034	3702.AT4G17230.1	3702.AT2G18790.1	0	0	0	0	0	0.765	0	0	0.765
HD1	SCL1	628517	610001	3702.AT4G38130.1	3702.AT1G21450.1	0	0	0	0	0	0.765	0	0	0.765
GID1C	GAI	631334	609337	3702.AT5G27320.1	3702.AT1G14920.1	0	0	0	0	0	0.752	0	0	0.752
GID1B	GAI	624540	609337	3702.AT3G63010.1	3702.AT1G14920.1	0	0	0	0	0	0.752	0	0	0.752
GID1B	RGA1	624540	614974	3702.AT3G63010.1	3702.AT2G01570.1	0	0	0	0	0	0.752	0	0	0.752
RGA1	SCL3	614974	611904	3702.AT2G01570.1	3702.AT1G50420.1	0	0	0	0.764	0	0.715	0	0	0.715
SCL3	GAI	611904	609337	3702.AT1G50420.1	3702.AT1G14920.1	0	0	0	0.766	0	0.715	0	0	0.715
JKD	RGA1	628952	614974	3702.AT5G03150.1	3702.AT2G01570.1	0	0	0	0	0	0.598	0	0	0.598
JKD	SCL3	628952	611904	3702.AT5G03150.1	3702.AT1G50420.1	0	0	0	0	0	0.598	0	0	0.598
GID1B	RGL2	624540	619440	3702.AT3G63010.1	3702.AT3G03450.1	0	0	0	0	0	0.566	0	0	0.566
GID1C	RGL2	631334	619440	3702.AT5G27320.1	3702.AT3G03450.1	0	0	0	0	0	0.566	0	0	0.566
GID1C	RGA1	631334	614974	3702.AT5G27320.1	3702.AT2G01570.1	0	0	0	0	0	0.566	0	0	0.566
RGL2	RGA1	619440	614974	3702.AT3G03450.1	3702.AT2G01570.1	0	0	0	0.956	0	0.563	0	0	0.563
RGA1	GAI	614974	609337	3702.AT2G01570.1	3702.AT1G14920.1	0	0	0	0.978	0	0.563	0	0	0.563
RGA1	BZR1	614974	614315	3702.AT2G01570.1	3702.AT1G75080.2	0	0	0	0	0	0.563	0	0	0.563
HD1	BZR1	628517	614315	3702.AT4G38130.1	3702.AT1G75080.2	0	0	0	0	0	0.559	0	0	0.559
RGL2	BZR1	619440	614315	3702.AT3G03450.1	3702.AT1G75080.2	0	0	0	0	0	0.558	0	0	0.558
