# Supplementary material for: The GRAS gene family in watermelons: identification, characterization and expression analysis of different tissues and root-knot nematode infestations
Source: PeerJ. 2021 May 26;9:e11526. doi: 10.7717/peerj.11526 (PMC8164414; doi:10.7717/peerj.11526)
Supplement: Supplemental Information 5 [file peerj-09-11526-s005.xlsx]

## Sheet: Roots qRT-pcr results
Well	Fluor	Target	Sample	Cq
A01	SYBR	ClGRAS2	RKN	22.7066
B01	SYBR	ClGRAS2	RKN	23.7225
C01	SYBR	ClGRAS2	RKN	23.2139
D01	SYBR	ClGRAS2	RL	22.8142
E01	SYBR	ClGRAS2	RL	23.8874
F01	SYBR	ClGRAS2	RL	23.5649
G01	SYBR	ClGRAS2	RR	27.8776
H01	SYBR	ClGRAS2	RR	29.0795
A02	SYBR	ClGRAS2	RR	28.249
B02	SYBR	ClGRAS2	CK	24.58
C02	SYBR	ClGRAS2	CK	25.4
D02	SYBR	ClGRAS2	CK	25.28
E02	SYBR	ClGRAS18	RKN	15.6544
F02	SYBR	ClGRAS18	RKN	15.5047
G02	SYBR	ClGRAS18	RKN	15.9544
H02	SYBR	ClGRAS18	RL	16.8543
A03	SYBR	ClGRAS18	RL	16.4274
B03	SYBR	ClGRAS18	RL	16.7372
C03	SYBR	ClGRAS18	CK	20.09
D03	SYBR	ClGRAS18	CK	20.02
E03	SYBR	ClGRAS18	CK	20.14
F03	SYBR	ClGRAS18	RR	19.2276
G03	SYBR	ClGRAS18	RR	19.4546
H03	SYBR	ClGRAS18	RR	18.949
A04	SYBR	ClGRAS28	RKN	24.2515
B04	SYBR	ClGRAS28	RKN	23.1945
C04	SYBR	ClGRAS28	RKN	23.5585
D04	SYBR	ClGRAS28	RL	24.6377
E04	SYBR	ClGRAS28	RL	23.6694
F04	SYBR	ClGRAS28	RL	23.9578
G04	SYBR	ClGRAS28	CK	28.25
H04	SYBR	ClGRAS28	CK	27.58
A05	SYBR	ClGRAS28	CK	27.82
B05	SYBR	ClGRAS28	RR	24.8195
C05	SYBR	ClGRAS28	RR	24.094
D05	SYBR	ClGRAS28	RR	24.0132
E05	SYBR	ClGRAS33	CK	27.07
F05	SYBR	ClGRAS33	CK	25.47
G05	SYBR	ClGRAS33	CK	26.63
H05	SYBR	ClGRAS33	RKN	24.0286
A06	SYBR	ClGRAS33	RKN	22.6414
B06	SYBR	ClGRAS33	RKN	23.3755
C06	SYBR	ClGRAS33	RL	26.1244
D06	SYBR	ClGRAS33	RL	24.4895
E06	SYBR	ClGRAS33	RL	25.5037
F06	SYBR	ClGRAS33	RR	23.5345
G06	SYBR	ClGRAS33	RR	21.855
H06	SYBR	ClGRAS33	RR	23.0571
A07	SYBR	18s	CK	8.83
B07	SYBR	18s	CK	8.62
C07	SYBR	18s	CK	8.23
D07	SYBR	18s	RKN	9.67
E07	SYBR	18s	RKN	8.25
F07	SYBR	18s	RKN	9.48
G07	SYBR	18s	RL	13.16
H07	SYBR	18s	RL	13.05
A08	SYBR	18s	RL	13.33
B08	SYBR	18s	RR	11.04
C08	SYBR	18s	RR	11.27
D08	SYBR	18s	RR	11

## Sheet: Leaves qRT-pcr results
Well	Fluor	Target	Sample	Cq
A01	SYBR	ClGRAS2	RKN	20.7009
B01	SYBR	ClGRAS2	RKN	21.9493
C01	SYBR	ClGRAS2	RKN	21.0574
D01	SYBR	ClGRAS2	RL	20.9218
E01	SYBR	ClGRAS2	RL	21.5694
F01	SYBR	ClGRAS2	RL	21.8074
G01	SYBR	ClGRAS2	RR	25.5759
H01	SYBR	ClGRAS2	RR	26.5925
A02	SYBR	ClGRAS2	RR	26.2691
B02	SYBR	ClGRAS2	CK	24.58
C02	SYBR	ClGRAS2	CK	25.4
D02	SYBR	ClGRAS2	CK	25.28
E02	SYBR	ClGRAS18	RKN	15.6709
F02	SYBR	ClGRAS18	RKN	15.5203
G02	SYBR	ClGRAS18	RKN	15.974
H02	SYBR	ClGRAS18	RL	16.2278
A03	SYBR	ClGRAS18	RL	16.4077
B03	SYBR	ClGRAS18	RL	16.1826
C03	SYBR	ClGRAS18	CK	20.09
D03	SYBR	ClGRAS18	CK	20.02
E03	SYBR	ClGRAS18	CK	20.14
F03	SYBR	ClGRAS18	RR	19.5246
G03	SYBR	ClGRAS18	RR	19.5395
H03	SYBR	ClGRAS18	RR	18.949
A04	SYBR	ClGRAS28	RKN	23.114
B04	SYBR	ClGRAS28	RKN	22.0725
C04	SYBR	ClGRAS28	RKN	22.7564
D04	SYBR	ClGRAS28	RL	24.5618
E04	SYBR	ClGRAS28	RL	23.5922
F04	SYBR	ClGRAS28	RL	23.9094
G04	SYBR	ClGRAS28	CK	28.25
H04	SYBR	ClGRAS28	CK	27.58
A05	SYBR	ClGRAS28	CK	27.82
B05	SYBR	ClGRAS28	RR	24.981
C05	SYBR	ClGRAS28	RR	23.7645
D05	SYBR	ClGRAS28	RR	24.8216
E05	SYBR	ClGRAS33	CK	27.07
F05	SYBR	ClGRAS33	CK	25.47
G05	SYBR	ClGRAS33	CK	26.63
H05	SYBR	ClGRAS33	RKN	25.8484
A06	SYBR	ClGRAS33	RKN	23.9559
B06	SYBR	ClGRAS33	RKN	25.7282
C06	SYBR	ClGRAS33	RL	30.533
D06	SYBR	ClGRAS33	RL	29.1793
E06	SYBR	ClGRAS33	RL	29.8939
F06	SYBR	ClGRAS33	RR	27.8832
G06	SYBR	ClGRAS33	RR	26.494
H06	SYBR	ClGRAS33	RR	27.0825
A07	SYBR	18s	CK	8.83
B07	SYBR	18s	CK	8.62
C07	SYBR	18s	CK	8.23
D07	SYBR	18s	RKN	9.67
E07	SYBR	18s	RKN	8.25
F07	SYBR	18s	RKN	9.48
G07	SYBR	18s	RL	13.16
H07	SYBR	18s	RL	13.05
A08	SYBR	18s	RL	13.33
B08	SYBR	18s	RR	11.04
C08	SYBR	18s	RR	11.27
D08	SYBR	18s	RR	11
